# Supplementary material for: Facile doping of nickel into Co3O4 nanostructures to make them efficient for catalyzing the oxygen evolution reaction
Source: Royal Society of Chemistry journal article supplement (doi:10.1039/d0ra00441c), 2020-01-01

## Facile nickel doping into $\text{Co}_3\text{O}_4$ nanostructures turned them efficient for oxygen evolution reaction

Adeel Liaquat Bhatti<sup>1</sup>, Umair Aftab<sup>4</sup>, Aneela Tahira<sup>2</sup>, Muhammad Ishaq Abro<sup>4</sup>, Muhammad Kashif samoon<sup>5</sup>, Muhammad Hassan Aghem<sup>5</sup>, Muhamad Ali Bhatti<sup>6</sup>, Zafar Hussain Ibupoto<sup>3\*</sup>

<sup>1</sup>Institute of Physics, University of Sindh, Jamshoro, 76080, Sindh Pakistan

<sup>2</sup>Department of Science and Technology, Campus Norrköping, Linköping University, SE-60174 Norrköping, Sweden

<sup>3</sup>Institute of Chemistry, University of Sindh, 76080 Jamshoro, Pakistan.

<sup>4</sup>Mehran University of Engineering and Technology, 7680 Jamshoro, Sindh Pakistan

<sup>5</sup>Centre of Pure and Applied Geology University of Sindh, Jamshoro 76080, Sindh, Pakistan

<sup>6</sup>Centre of Environmental Sciences 76080, Jamshoro, Sindh Pakistan

\* **Corresponding author:** Zafar Hussian Ibupoto, PhD

**Email address:** [zaffar.ibhupoto@usindh.edu.pk](mailto:zaffar.ibhupoto@usindh.edu.pk)

**S1:** SEM image of pristine cobalt oxide

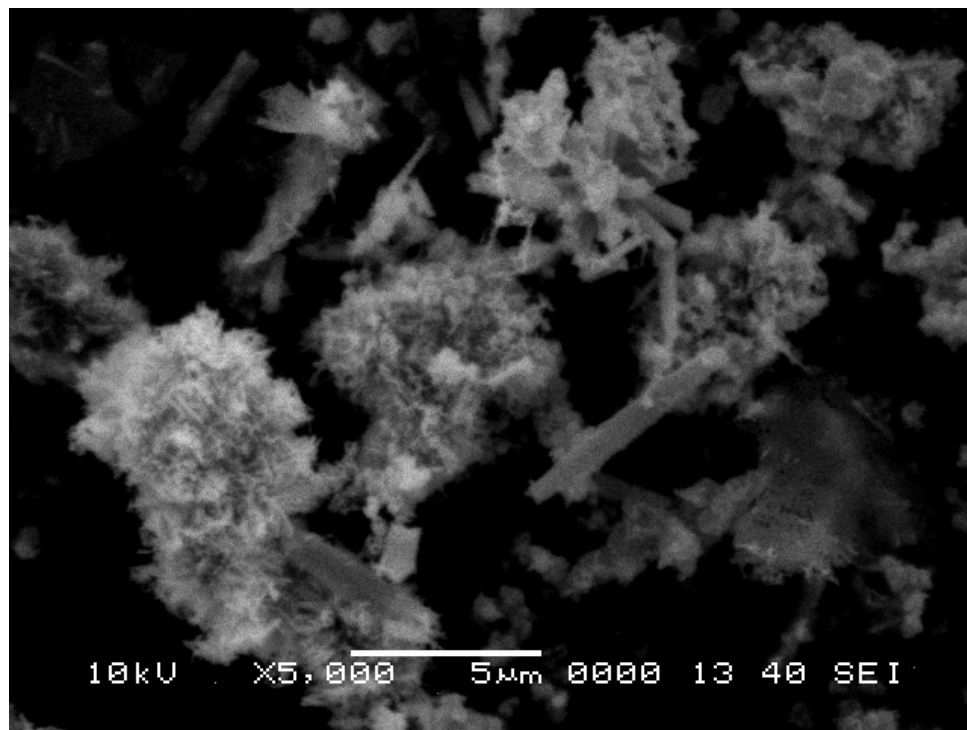

Supplement: d0ra00441c1.pdf [file d0ra00441c1.pdf]
